# Supplementary material for: Identification of 4-N-[2-(4-phenoxyphenyl)ethyl]quinazoline-4,6-diamine as a novel, highly potent and specific inhibitor of mitochondrial complex I
Source: Royal Society of Chemistry journal article supplement (doi:10.1039/c6md00655h), 2017-01-01
Supplement: c6md00655h1.pdf [file c6md00655h1.pdf]

### Supplementary information

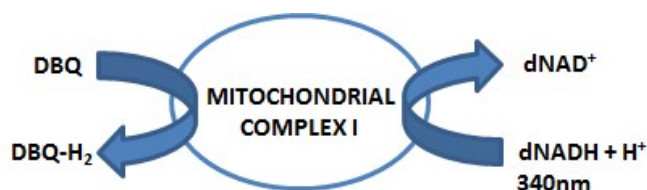

**Figure S1** Schematic representation of the spectrophotometric assay used in this study. The decylubiquinone (DBQ) reduction to ubiquinol (DBQ-H<sub>2</sub>) is coupled to dNADH oxidation. The enzymatic activity was monitored by the decrease in dNADH absorbance at 340 nm.

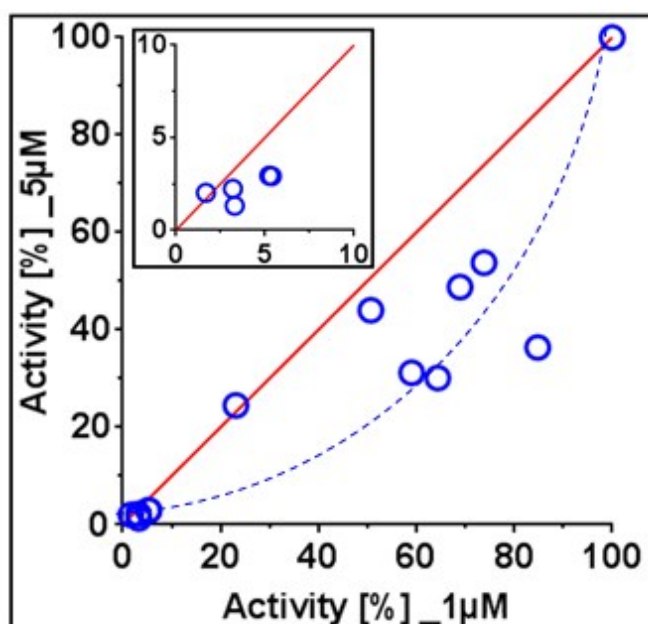

**Figure S2** Correlation of the inhibitory activity of tested compounds at 1 μM and 5 μM top concentration. Activity [%] =  $(1 - ((\text{Abs}^{\text{sample}} - \text{Abs}^{\text{blank}}) / \text{Abs}^{\text{control}})) \times 100$
